# Supplementary material
Source: Research Square preprint supplement (doi:10.21203/rs.3.rs-10238196/v1)
Supplement: Supplementary file 1 [file f4fef44519b7643be7bef58b.docx]

# APPENDIX A

Table A1 Current direct ESG Indicators Applicable to Corporate Climate Resilience

| Name of indicator | Database | Topic | Justification |
| --- | --- | --- | --- |
| Exposure to areas of high water stress | Commission Delegated Regulation (EU) 2022/1288 | Water | Investments in high water-stress areas signal corporate vulnerability to climate impacts, directly linking this indicator to climate resilience. |
| Integration of climate risks into enterprise risk management (ERM) | CSRD - ESRS | Risk management | Integrating climate risks into the risk system is key to strategic preparedness, adaptation and risk management. |
| Disruption risk to value chain workers due to climate impacts | CSRD - ESRS | Supply chain / HR | The climate exposure of workers (e.g. working outdoors in extreme heat) directly affects the stability of the supply chain and the continuity of operations. |
| Adaptation support measures for suppliers and workers | CSRD - ESRS | Supply chain / HR | If the company supports its suppliers and employees to adapt, the resilience of the whole value chain increases - making the system more sustainable in the long run. |
| Financial implications and other risks and opportunities due to climate change (Disclosure 201-2) | GRI | Financial risks | Identifying financial exposure and opportunities shows how prepared a company is to adapt to climate risks. Assessing these is key to resilience. |
| Identification of principal crops and description of risks and opportunities presented by climate change  FB-AG-440a.1 | SASB | Climate risk & adaptation | Identifying key crops and their climate-related risks supports the assessment of agricultural vulnerability and climate adaptation capacity. |
| Is there an environmental-social risk management process? | SARA questionnaire | Risk management | A key factor for resilience is whether there is a structured identification and response mechanism, which is a sign of adaptive capacity. |
| Rate of compensation for weather-related damage (2 years) | SARA questionnaire | Financial risks | Concrete feedback on past vulnerability - an important financial indicator for assessing resilience. |
| Overall Exposure / Physical Climate Risk Metrics | Sustainalytics TCFD | Physical climate risk | These indicators directly measure a company's exposure to current and future physical climate risks. These are the basis of resilience. |
| Direct / Indirect Exposure | Sustainalytics TCFD | Exposure, operations / supply chain | It is an important indicator of whether the risk is direct (it happens on site, during production) or indirect (e.g. it appears among the suppliers) - influencing the response. |
| Geographic & Hazard Coverage | Sustainalytics TCFD | Spatial coverage, climate risk | The more detailed and geographically differentiated the hazard assessment, the better the resilience can be planned. |
| Physical Climate Value at Risk | Sustainalytics TCFD | Financial risks | It shows how much potential financial value is at risk from climate impacts and can therefore be used as a financial measure of climate resilience. |
| Value of compensation and uncompensated losses due to natural disasters | HNB Green Recommendation | Financial risks | It is a direct indicator of a company's climate exposure and vulnerability, and thus provides important feedback on past lack of resilience and insurance coverage. |

# APPENDIX B

**Interview questions to explore the relationship between climate resilience and ESG**

I. General overview

What climate change-related risks have you identified in your operations so far (e.g. drought, heat wave, extreme weather events, etc.) How have you responded to these? Could you provide examples of specific years, specific losses or adaptation activities?

Have you been involved in any compensation or insurance payments after a climate change related event? (If yes, what event, what was the damage, lessons learned?)

How is your business affected by climate change (weather extremes, water supply, crop yields, energy supply, workforce exposure to extremes)?

Are climate change risks embedded in the company's overall risk management system (ERM - Enterprise Risk Management)?

II. Climate resilience in corporate strategy

Do you have a dedicated strategy to prepare for the physical impacts of climate change? (If yes, what are its main pillars?)

Do these strategies follow any national or EU strategies or international objectives?

Have you heard of climate resilience, climate adaptation? What do you think it means?

Do you have a dedicated area/employee in your company which/who deals with ESG and/or climate resilience?

What concrete steps have been taken so far to reduce their vulnerability (e.g. water management improvements, technological investments, insurance schemes)?

Do you use forecasting models or weather sensor data in your daily decision making? What technological tools are used to support decision making?

To what extent are adaptation measures integrated into corporate sustainability strategies or reports?

Is there regular measurement and monitoring of the development of climate resilience? If so, what indicators are used (indicators, identification of key areas)

Do you have climate resilience targets? Over what timeframe and to what extent?

What external standards or frameworks (e.g. TCFD, EU Taxonomy, MNB Green Recommendation) are taken into account when reporting?

In which areas do you see the greatest challenges in increasing climate resilience? Are there any ideas on how to address these challenges?

Have you considered which parts of your supply chain are most vulnerable to climate risks (e.g. primary producers, supply routes, regions)?

What do you see as the biggest challenges to adaptation, such as technological, financial or knowledge constraints?

What new technologies or solutions (e.g. regenerative agriculture, precision irrigation, heat-resistant varieties) do you see as promising to increase climate resilience?

Do you use spatial data or models to predict and manage climate risks?

Based on the answers to the questions so far, do you consider it necessary to include the measurement of corporate climate resilience as an integral part of future ESG assessments?

What indicators would you consider credible and measurable for assessing corporate climate resilience?

Do you think there is a need to strengthen adaptation to climate change?

What subsidies and regulations do you think would best help agri-food companies to strengthen climate resilience?

How do you ensure the welfare of workers, especially seasonal workers (if any)?

Are education, training or knowledge transfer programmes in place or planned to help prepare local partners or workers for climate change?
